# Supplementary material
Source: MDPI journal article supplement (https://www.mdpi.com/2413-8851/8/1/22)
Supplement: s1 [file s1]

## Supplementary Material

**Table S1.** Variance explained by principal components and selected indicators

| PC number | PC name                              | PC loadings > 1.0<br>Original variables                                                                                                                                                                                                                                                                                                                                                                                                                                  | Variance explained (%) |
|-----------|--------------------------------------|--------------------------------------------------------------------------------------------------------------------------------------------------------------------------------------------------------------------------------------------------------------------------------------------------------------------------------------------------------------------------------------------------------------------------------------------------------------------------|------------------------|
| 1         | Governance                           | <b>Control of Corruption</b><br>Government Effectiveness<br>Regulatory Quality<br>Rule of Law<br>Voice and Accountability<br>Public service quality<br>Impartiality<br>Corruption in public services<br>Trust in the legal system<br>Not employed persons (% pop15_29)                                                                                                                                                                                                   | 26.6                   |
| 2         | Economic Development                 | Internet at home<br>Road accident fatalities<br>Disposable income of households<br>Total employment (btw 15-64)<br>Unemployment<br>Employment in high-tech sectors<br><b>Employment in Science &amp; Technology</b><br>Total waste production (metric tones)<br>Total turnover generated by material providers' activities (million euro)<br>Total employment in technology providers sectors<br>Total turnover generated by technology providers sectors (million euro) | 10.8                   |
| 3         | Health & Work                        | Lower secondary education completion (%pop25-64)<br>Involuntary part-time/temporary employment<br>Hearth diseases death rate<br>Premature mortality (<65)<br><b>Life expectancy</b><br>MEAN_PM2.5 emissions<br>MEAN_PM10 emissions                                                                                                                                                                                                                                       | 8.4                    |
| 4         | Access to Services                   | <b>Poor access to primary schools</b><br>Poor access to secondary schools<br>Poor access to hospitals<br>Poor access to pharmacies<br>Poor access to bank offices<br>Poor access to train station<br>Poor access to shops<br>Poor access to regional centres                                                                                                                                                                                                             | 8.1                    |
| 5         | Environmental Quality                | Coverage percentage of GI within a region (%)<br>Share of agricultural area in protected areas<br>Percentage share of agricultural use areas<br>Employment in material providers for the circular economy                                                                                                                                                                                                                                                                | 5.7                    |
| 6         | Soil Protection                      | <b>Change in annual mean number of days with snow cover</b><br><b>MEAN_Ozone3 emissions</b><br>Soil retention<br>Soil sealing in a region<br>Percentage share of agricultural use areas<br>Annual amount of raw material extracted from natural environment (1000 tones)                                                                                                                                                                                                 | 3.7                    |
| 7         | Quality and Affordability of Housing | Burdensome cost of housing<br>Lack of adequate heating<br>Early school leavers<br>MEAN_PM10 emissions<br>Uncollected sewage                                                                                                                                                                                                                                                                                                                                              | 3.2                    |
| 8         | Green Land                           | <b>Development of urban use per capita 2000-2018</b><br>Green infrastructure initiatives<br>Higher education attainment rate (%) pop_25_64<br>Cancer death rate<br>EU trademark applications per million inhabitant                                                                                                                                                                                                                                                      | 2.8                    |
| 9         | Security of Citizens                 | <b>Forest area within a region between 2012_2018</b><br>Political Stability and Absence of Violence/Terrorism<br><b>Assaulted/Mugged (%)</b><br>Higher education attainment rate (%) pop_25_64<br>Early school leavers (%)                                                                                                                                                                                                                                               | 2.1                    |
| 10        |                                      | Internet access (%)                                                                                                                                                                                                                                                                                                                                                                                                                                                      | 2                      |

|    |                            |                                                        |     |
|----|----------------------------|--------------------------------------------------------|-----|
|    | Quality of Public Services | <b>Unmet medical needs (%)</b>                         |     |
|    |                            | CO2 emissions per capita                               |     |
|    |                            | Sewage treatment                                       |     |
| 12 | Public Health              | <b>Cancer death rate</b>                               | 1.5 |
|    |                            | EU trademark applications per million inhabitant       |     |
|    |                            | Uncollected sewage                                     |     |
| 13 | Education & Environment    | Early school leavers                                   | 1.4 |
|    |                            | <b>CO2 emissions per capita</b>                        |     |
|    |                            | Electricity generated by renewable energy sources (PJ) |     |
|    |                            | Area of NATURA2000 areas relative to NUTS2 region area |     |
| 14 | Quality of Communities     | Crime rates                                            | 1.3 |
|    |                            | <b>Higher education attainment rate (%) pop_25_64</b>  |     |
|    |                            | Community design applications per million inhabitants  |     |
|    |                            | Crime rates                                            |     |
|    |                            | Community design applications per million inhabitants  |     |
|    |                            | Money stolen                                           |     |
| 15 | Security of Urban Areas    | <b>Lifelong learning</b>                               | 1.1 |
|    |                            | Cancer death rate                                      |     |

**Note:** Other than these, the selected indicators from PC loadings are: PC-16: Poor accessibility to shops; PC-17: Housing quality; PC-18: Insufficient food; PC-19: Share of urban area in protected areas (X76); PC-20: Freshwater consumption (Lt/day/capita) (X69); PC-21: Supply-demand balance quantified by Water Retention Index (X67); PC-22: Early school leavers (X25); PC-23: Electricity generated by renewable energy sources (PJ) (X59); PC-24: Area of NATURA2000 land relative to NUTS2 region area (X73); PC-25: Crime rates (X14); PC-26: Municipal solid waste recycling rate (X61); PC-27: Total employment in CBM sectors (X85); PC-28: Soil retention (X71); PC-29: Ratio of closest doctors (X90); PC-30: Poor access to urban morphological zones (jobs) (X94).
