# Supplementary material
Source: MDPI journal article supplement (https://www.mdpi.com/2413-8851/8/1/22)
Supplement: s1 [file s1]

Archive with 1 entries (1 files):
- urbansci-2896478-supplementary.pdf
